# Supplementary material for: One-step high-yield preparation of nitrogen- and sulfur-codoped carbon dots with applications in chromium(vi) and ascorbic acid detection
Source: Royal Society of Chemistry journal article supplement (doi:10.1039/d2ra01758j), 2022-01-01
Supplement: d2ra01758j1.pdf [file d2ra01758j1.pdf]

## Supplementary information

### One-step high-yield preparation of nitrogen- and sulfur-codoped carbon dots with applications in chromium (VI) and ascorbic acid detection

Fanrong Meng,<sup>a</sup> Haoran Xu,<sup>a</sup> Shuolin Wang,<sup>a</sup> Jingxian Wei,<sup>a</sup> Wengong Zhou,<sup>a</sup> Qiang Wang,<sup>a</sup> Peng Li,<sup>a</sup> Fangong Kong,<sup>a</sup> Yucang Zhang<sup>\* b</sup>

<sup>a</sup>State Key Laboratory of Biobased Material and Green Papermaking, Qilu University of Technology (Shandong Academy of Sciences), Jinan, 250353, P.R. China

<sup>b</sup>College of food and biological engineering, Jimei University, Xiamen, 361021, P.R. China

\*Yucang Zhang, Ph. D., College of food and biological engineering, Jimei University, Xiamen, China

Email: yczhang@jmu.edu.cn

**Table S1.** Optimal excitation-emission wavenumber and SY of the different CDs synthesized

|                            | CDs-IP | CDs-PM | CDs-IPM | CDs-IM | CDs-A |
|----------------------------|--------|--------|---------|--------|-------|
| $\lambda_{\text{ex}}$ (nm) | 451    | 442    | 455     | 448    | 425   |
| $\lambda_{\text{em}}$ (nm) | 392    | 358    | 397     | 356    | 252   |
| SY (%)                     | 9.2%   | 25.7%  | 65.69%  | 37.6%  | 18.3% |

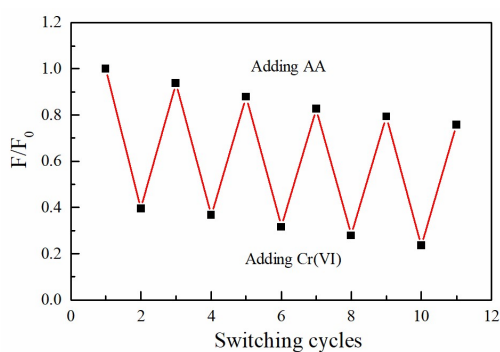

**Fig. S1.** Switching cycles of the CD-IPMs/Cr (VI) samples upon alternate addition of Cr (VI) (20  $\mu\text{M}$ ) and AA (20  $\mu\text{M}$ ) in pH 7.4 HEPES buffered water ( $\lambda_{\text{ex}} = 397 \text{ nm}$ ,  $\lambda_{\text{em}} = 455 \text{ nm}$ )

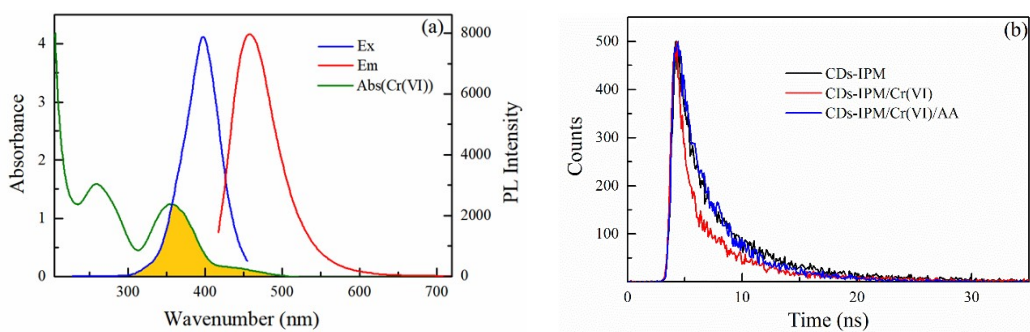

**Fig. S2** (a) The overlap between the ultraviolet absorption spectrum of Cr (VI) and fluorescence excitation and emission spectra of CD-IPMs. (b) Fluorescence decay curves of CD-IPMs with and without the existence of Cr (VI) (20 $\mu$ M), after addition of AA (20  $\mu$ M) as a function of time at  $\lambda_{ex}/\lambda_{em}$  of 397/455 nm.

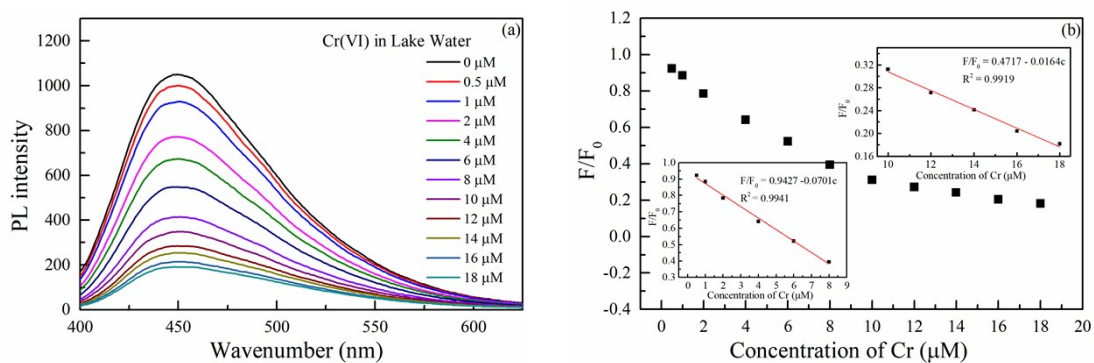

**Fig. S3** (a) Fluorescence emission spectra of CDs-IPM with different amount of Cr(VI) in lake water under 397 nm excitation. (b) The linear relationship between fluorescence intensity ratio ( $F/F_0$ ) and concentration of Cr(VI) in lake water.

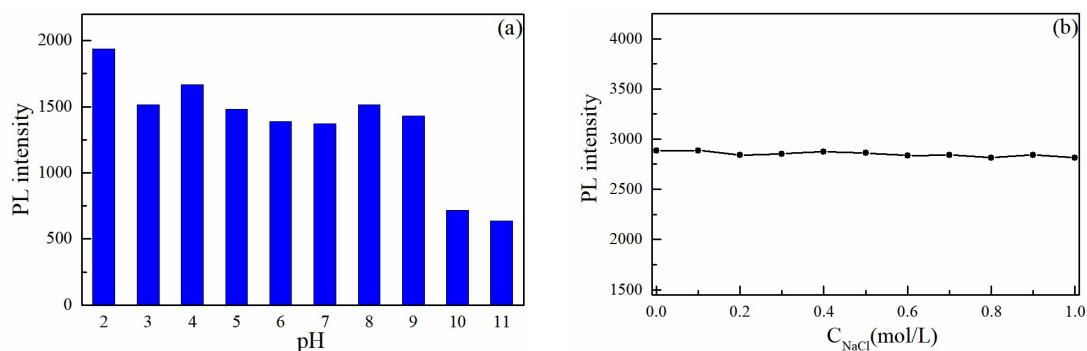

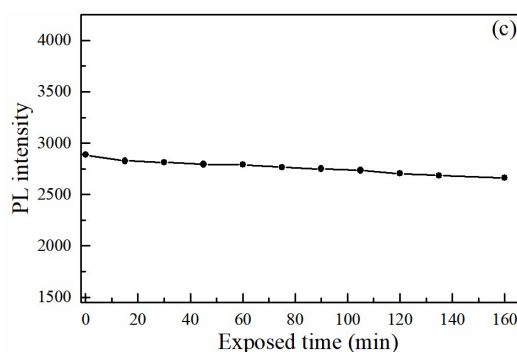

**Fig. S4** The PL intensity of CD-IPMs at different (a) pH values, (b) ionic strengths, and (c) storage time periods under ultraviolet light-based experimental conditions.

**Table S2.** The sensor performance for Cr(VI) detection in comparison with previous works

| Sensor    | Size<br>(nm) | Linear range<br>( $\mu\text{M}$ ) | LOD<br>( $\mu\text{M}$ ) | QY<br>(%) | Reference |
|-----------|--------------|-----------------------------------|--------------------------|-----------|-----------|
| PNCQDs    | 4.24-6.33    | 1.5-30                            | 0.023                    | 9.6       | 1         |
| C-dots    | 2-4          | 1000–6000                         | --                       | 10.2      | 2         |
| N, Cl-CDs | 3.7–5.8      | 3-40                              | 0.28                     | --        | 3         |
| CDs-220   | 6-9          | 0.2-40                            | 0.25                     | 21.85     | 4         |
| N-C-dots  | 2-8          | 2-9                               | 1.9                      | 17.6      | 5         |
| CQD       | 1-5          | 5-100                             | 14                       | 15.34     | 6         |
| NCND      | 7            | 10-100                            | 9000                     | --        | 7         |
| S, N-CDs  | 1-9          | 0.03–50                           | 0.021                    | 17        | 8         |
| CDs-IPM   | 1-4.6        | 3-30                              | 0.017                    | 29.27     | This work |

## Reference

1. X. Gong, Y. Liu, Z. Yang, S. Shuang, Z. Zhang and C. Dong, *Analytica Chimica Acta*, 2017, **968**, 85-96.
2. J. Wang, F. Qiu, X. Li, H. Wu, J. Xu, X. Niu, J. Pan, T. Zhang and D. Yang, *Journal of Luminescence*, 2017, **188**, 230-237.
3. Q. Hu, T. Li, L. Gao, X. Gong, S. Rao, W. Fang, R. Gu and Z. Yang, *Sensors*, 2018, **18**.
4. B. Wang, Y. Lin, H. Tan, M. Luo, S. Dai, H. Lu and Z. Huang, *Analyst*, 2018, **143**, 1906-1915.
5. R. V. S. Misra, M. K. Santra and D. Othoor, *Journal of Photochemistry and Photobiology A: Chemistry*, 2019, **373**, 28-36.
6. M. Athika, A. Prasath, E. Duraisamy, V. Sankar Devi, A. Selva Sharma and P. Elumalai, *Materials Letters*, 2019, **241**, 156-159.
7. R. M. Mathew, E. S. Zachariah, J. Jose, J. John, T. Titus and V. Thomas, *AIP Conference Proceedings*, 2020, **2287**, 020014.
8. Y. Ji, X. Zou, W. Wang, T. Wang, S. Zhang and Z. Gong, *Microchemical Journal*, 2021, **167**, 106284.
